# Supplementary material for: 3-D models and structural analysis of rock avalanches: the study of thedeformation process to better understand the propagation mechanism
Source: Copernicus journal article supplement (doi:10.5194/esurf-4-743-2016), 2016-09-28
Supplement: Supplementary file 1 [file esurf-4-743-2016-supplement.zip]

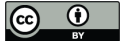

## *Supplement of*

# **3-D models and structural analysis of rock avalanches: the study of the deformation process to better understand the propagation mechanism**

**Céline Longchamp et al.**

*Correspondence to:* C. Longchamp (celine.longchamp@unil.ch)

- esurf-4-743-2016-supplement-title-page.pdf
- supplemental material.mp4

The copyright of individual parts of the supplement might differ from the CC-BY 3.0 licence.
